# Supplementary material
Source: MDPI journal article supplement (https://www.mdpi.com/2673-7256/2/1/8)
Supplement: s1 [file s1]

## UV Photolysis Study of *Para*-Aminobenzoic Acid Using Parahydrogen Matrix Isolation Spectroscopy

Alexandra McKinnon, Brendan Moore, Pavle Djuricanin, and Takamasa Momose

*Department of Chemistry, The University of British Columbia, 2036 Main Mall, Vancouver BC V6T 1Z1, CANADA. Fax: 604 822 2847; Tel: 604 822 5265; E-mail: [momose@chem.ubc.ca](mailto:momose@chem.ubc.ca)*

### Electronic Supplementary Information Table of Contents:

|                                                                                                                                                                                |    |
|--------------------------------------------------------------------------------------------------------------------------------------------------------------------------------|----|
| <b>Table S1:</b> The observed wavenumbers and their absorption cross sections used in this work. ....                                                                          | 2  |
| <b>Table S2:</b> Geometry of the two PABA conformers. ....                                                                                                                     | 3  |
| <b>Figure S1 a) through j):</b> The entire spectrum of PABA in a solid $p\text{H}_2$ matrix. ....                                                                              | 5  |
| <b>Table S3:</b> The frequencies and intensities of PABA Conformer (II) compared to Conformer (I) and the $p\text{H}_2$ Matrix. ....                                           | 7  |
| <b>Table S4:</b> The frequencies and intensities of the aromatic-centred anilino radical. ....                                                                                 | 9  |
| <b>Table S5:</b> The frequencies and intensities of the aromatic-centred benzoic acid radical. ....                                                                            | 10 |
| <b>Figure S2 a) through j):</b> The PABA radical peaks from $> 280$ nm, 266 nm, and 213 nm irradiation compared to the calculated anharmonic B3LYP / cc-pVDZ intensities. .... | 11 |
| <b>Figure S3 a) and b):</b> The temporal behaviour of the unknown ketene following 266 nm and 213 nm photolysis. ....                                                          | 13 |
| <b>Table S6:</b> The frequencies and intensities of the PABA radical Conformer (II) compared to Conformer (I) and the $p\text{H}_2$ Matrix. ....                               | 14 |
| <b>Table S7:</b> Other photoproducts observed following PABA irradiation. ....                                                                                                 | 15 |
| <b>Table S8:</b> The frequencies and intensities of the PABA radical Conformer (III) and Conformer (IV). ....                                                                  | 16 |

Table S1: The observed wavenumbers and their absorption cross sections used in this work.

| Species                     | Mode                               | Frequency               | Absorption Coefficient      |
|-----------------------------|------------------------------------|-------------------------|-----------------------------|
| PABA                        | $\nu_{37}$ NH <sub>2</sub> Scissor | 1624.2 cm <sup>-1</sup> | 271.97 km mol <sup>-1</sup> |
| PABA Radical Conformer (I)  | $\nu_{23}$ H-C-C Rock              | 1079.5 cm <sup>-1</sup> | 70.4 km mol <sup>-1</sup>   |
| PABA Radical Conformer (II) | $\nu_{23}$ H-C-C Rock              | 1077.2 cm <sup>-1</sup> | 49.8 km mol <sup>-1</sup>   |
| <i>trans</i> -HOCO          | $\nu_2$ C=O Stretch                | 1845.1 cm <sup>-1</sup> | 203.6 km mol <sup>-1</sup>  |

Table S2: Geometry of the two Conformers of PABA

| Parameter                                                              | Conformer (I) | Conformer (II) |
|------------------------------------------------------------------------|---------------|----------------|
| r(H <sub>11</sub> – N <sub>9</sub> )                                   | 1.014         | 1.014          |
| r(H <sub>10</sub> – N <sub>9</sub> )                                   | 1.014         | 1.014          |
| r(N <sub>9</sub> – C <sub>4</sub> )                                    | 1.386         | 1.385          |
| r(C <sub>4</sub> – C <sub>3</sub> )                                    | 1.412         | 1.410          |
| r(C <sub>4</sub> – C <sub>5</sub> )                                    | 1.412         | 1.412          |
| r(C <sub>3</sub> – C <sub>2</sub> )                                    | 1.390         | 1.391          |
| r(C <sub>5</sub> – C <sub>6</sub> )                                    | 1.388         | 1.387          |
| r(C <sub>6</sub> – C <sub>1</sub> )                                    | 1.405         | 1.406          |
| r(C <sub>1</sub> – C <sub>2</sub> )                                    | 1.406         | 1.405          |
| r(C <sub>5</sub> – H <sub>8</sub> )                                    | 1.093         | 1.093          |
| r(C <sub>3</sub> – H <sub>12</sub> )                                   | 1.093         | 1.093          |
| r(C <sub>2</sub> – H <sub>13</sub> )                                   | 1.090         | 1.094          |
| r(C <sub>6</sub> – H <sub>7</sub> )                                    | 1.091         | 1.091          |
| r(C <sub>1</sub> – C <sub>14</sub> )                                   | 1.478         | 1.492          |
| r(C <sub>14</sub> – O <sub>15</sub> )                                  | 1.216         | 1.209          |
| r(C <sub>14</sub> – O <sub>16</sub> )                                  | 1.362         | 1.364          |
| r(H <sub>17</sub> – O <sub>16</sub> )                                  | 0.974         | 0.969          |
| ∠(H <sub>11</sub> – N <sub>9</sub> – C <sub>4</sub> )                  | 116.131       | 116.105        |
| ∠(H <sub>10</sub> – N <sub>9</sub> – C <sub>4</sub> )                  | 116.097       | 116.239        |
| ∠(H <sub>10</sub> – N <sub>9</sub> – H <sub>11</sub> )                 | 112.622       | 112.630        |
| ∠(N <sub>9</sub> – C <sub>4</sub> – C <sub>3</sub> )                   | 120.730       | 120.858        |
| ∠(N <sub>9</sub> – C <sub>4</sub> – C <sub>5</sub> )                   | 120.690       | 120.790        |
| ∠(C <sub>4</sub> – C <sub>3</sub> – H <sub>12</sub> )                  | 119.399       | 119.581        |
| ∠(C <sub>4</sub> – C <sub>5</sub> – H <sub>8</sub> )                   | 119.425       | 119.384        |
| ∠(C <sub>6</sub> – C <sub>5</sub> – H <sub>8</sub> )                   | 120.084       | 119.973        |
| ∠(C <sub>2</sub> – C <sub>3</sub> – H <sub>12</sub> )                  | 119.970       | 119.923        |
| ∠(C <sub>5</sub> – C <sub>6</sub> – H <sub>7</sub> )                   | 120.711       | 120.722        |
| ∠(C <sub>3</sub> – C <sub>2</sub> – H <sub>13</sub> )                  | 119.880       | 117.792        |
| ∠(C <sub>5</sub> – C <sub>4</sub> – C <sub>3</sub> )                   | 118.524       | 118.307        |
| ∠(C <sub>2</sub> – C <sub>3</sub> – C <sub>4</sub> )                   | 120.631       | 120.494        |
| ∠(C <sub>6</sub> – C <sub>5</sub> – C <sub>4</sub> )                   | 120.491       | 120.643        |
| ∠(C <sub>1</sub> – C <sub>6</sub> – C <sub>5</sub> )                   | 120.918       | 121.250        |
| ∠(C <sub>1</sub> – C <sub>2</sub> – C <sub>3</sub> )                   | 120.706       | 121.290        |
| ∠(C <sub>1</sub> – C <sub>6</sub> – H <sub>7</sub> )                   | 118.372       | 118.028        |
| ∠(C <sub>1</sub> – C <sub>2</sub> – H <sub>13</sub> )                  | 119.414       | 120.885        |
| ∠(C <sub>14</sub> – C <sub>1</sub> – C <sub>2</sub> )                  | 122.733       | 124.112        |
| ∠(C <sub>14</sub> – C <sub>1</sub> – C <sub>6</sub> )                  | 118.535       | 117.857        |
| ∠(O <sub>16</sub> – C <sub>14</sub> – C <sub>1</sub> )                 | 113.089       | 117.026        |
| ∠(O <sub>15</sub> – C <sub>14</sub> – C <sub>1</sub> )                 | 125.360       | 123.600        |
| ∠(H <sub>17</sub> – O <sub>16</sub> – C <sub>14</sub> )                | 105.041       | 109.511        |
| Θ(C <sub>3</sub> – C <sub>4</sub> – N <sub>9</sub> – H <sub>11</sub> ) | -159.333      | -159.218       |
| Θ(C <sub>5</sub> – C <sub>4</sub> – N <sub>9</sub> – H <sub>10</sub> ) | 159.288       | 159.259        |

|                                                                         |          |          |
|-------------------------------------------------------------------------|----------|----------|
| $\Theta(\text{C}_3 - \text{C}_4 - \text{N}_9 - \text{H}_{10})$          | -23.495  | -23.227  |
| $\Theta(\text{C}_5 - \text{C}_4 - \text{N}_9 - \text{H}_{11})$          | 23.450   | 23.268   |
| $\Theta(\text{C}_2 - \text{C}_3 - \text{C}_4 - \text{C}_5)$             | 0.035    | 0.650    |
| $\Theta(\text{C}_6 - \text{C}_5 - \text{C}_4 - \text{C}_3)$             | -0.019   | -0.237   |
| $\Theta(\text{H}_{12} - \text{C}_3 - \text{C}_2 - \text{H}_{13})$       | 0.278    | 1.651    |
| $\Theta(\text{H}_8 - \text{C}_5 - \text{C}_6 - \text{H}_7)$             | -0.276   | -0.673   |
| $\Theta(\text{C}_2 - \text{C}_3 - \text{C}_4 - \text{N}_9)$             | -177.242 | -176.925 |
| $\Theta(\text{C}_6 - \text{C}_5 - \text{C}_4 - \text{N}_9)$             | 177.259  | 177.340  |
| $\Theta(\text{C}_3 - \text{C}_4 - \text{C}_5 - \text{H}_8)$             | -179.885 | 179.606  |
| $\Theta(\text{N}_9 - \text{C}_4 - \text{C}_3 - \text{H}_{12})$          | 2.602    | 3.528    |
| $\Theta(\text{N}_9 - \text{C}_4 - \text{C}_5 - \text{H}_8)$             | -2.607   | -2.818   |
| $\Theta(\text{C}_5 - \text{C}_4 - \text{C}_3 - \text{H}_{12})$          | 179.879  | -178.987 |
| $\Theta(\text{C}_4 - \text{C}_5 - \text{C}_6 - \text{H}_7)$             | 179.859  | 179.168  |
| $\Theta(\text{C}_4 - \text{C}_3 - \text{C}_2 - \text{H}_{13})$          | -179.879 | -177.894 |
| $\Theta(\text{C}_2 - \text{C}_1 - \text{C}_6 - \text{H}_7)$             | -179.863 | -178.509 |
| $\Theta(\text{C}_6 - \text{C}_1 - \text{C}_2 - \text{H}_{13})$          | 179.864  | 176.753  |
| $\Theta(\text{C}_1 - \text{C}_2 - \text{C}_3 - \text{C}_4)$             | -0.036   | 0.034    |
| $\Theta(\text{C}_1 - \text{C}_6 - \text{C}_5 - \text{C}_4)$             | 0.004    | -0.0871  |
| $\Theta(\text{C}_1 - \text{C}_2 - \text{C}_3 - \text{H}_{12})$          | -179.879 | 179.580  |
| $\Theta(\text{C}_1 - \text{C}_6 - \text{C}_5 - \text{H}_8)$             | 179.869  | 179.287  |
| $\Theta(\text{C}_{14} - \text{C}_1 - \text{C}_2 - \text{C}_3)$          | -179.870 | -179.026 |
| $\Theta(\text{C}_{14} - \text{C}_1 - \text{C}_6 - \text{C}_5)$          | 179.891  | 179.576  |
| $\Theta(\text{C}_{14} - \text{C}_1 - \text{C}_2 - \text{H}_{13})$       | -0.026   | -1.161   |
| $\Theta(\text{C}_{14} - \text{C}_1 - \text{C}_6 - \text{H}_7)$          | 0.032    | -0.462   |
| $\Theta(\text{O}_{15} - \text{C}_{14} - \text{C}_1 - \text{C}_2)$       | 179.871  | 165.206  |
| $\Theta(\text{O}_{15} - \text{C}_{14} - \text{C}_1 - \text{C}_6)$       | -0.019   | -12.712  |
| $\Theta(\text{O}_{16} - \text{C}_{14} - \text{C}_1 - \text{C}_2)$       | -0.116   | -14.895  |
| $\Theta(\text{O}_{16} - \text{C}_{14} - \text{C}_1 - \text{C}_6)$       | 179.994  | 167.187  |
| $\Theta(\text{H}_{17} - \text{O}_{16} - \text{C}_{14} - \text{C}_1)$    | -179.963 | -10.030  |
| $\Theta(\text{H}_{17} - \text{O}_{16} - \text{C}_{14} - \text{O}_{15})$ | 0.049    | 169.873  |

r = distance (Å)

∠ = angle (°)

Θ = dihedral angle (°)

Figure S1 a) through j) : The entire spectrum of PABA in a solid  $pH_2$  matrix with the theoretical intensities of Conformer (I) (red) and Conformer (II) (blue). Some spectra are enlarged for clarity, as identified in the top right corner.

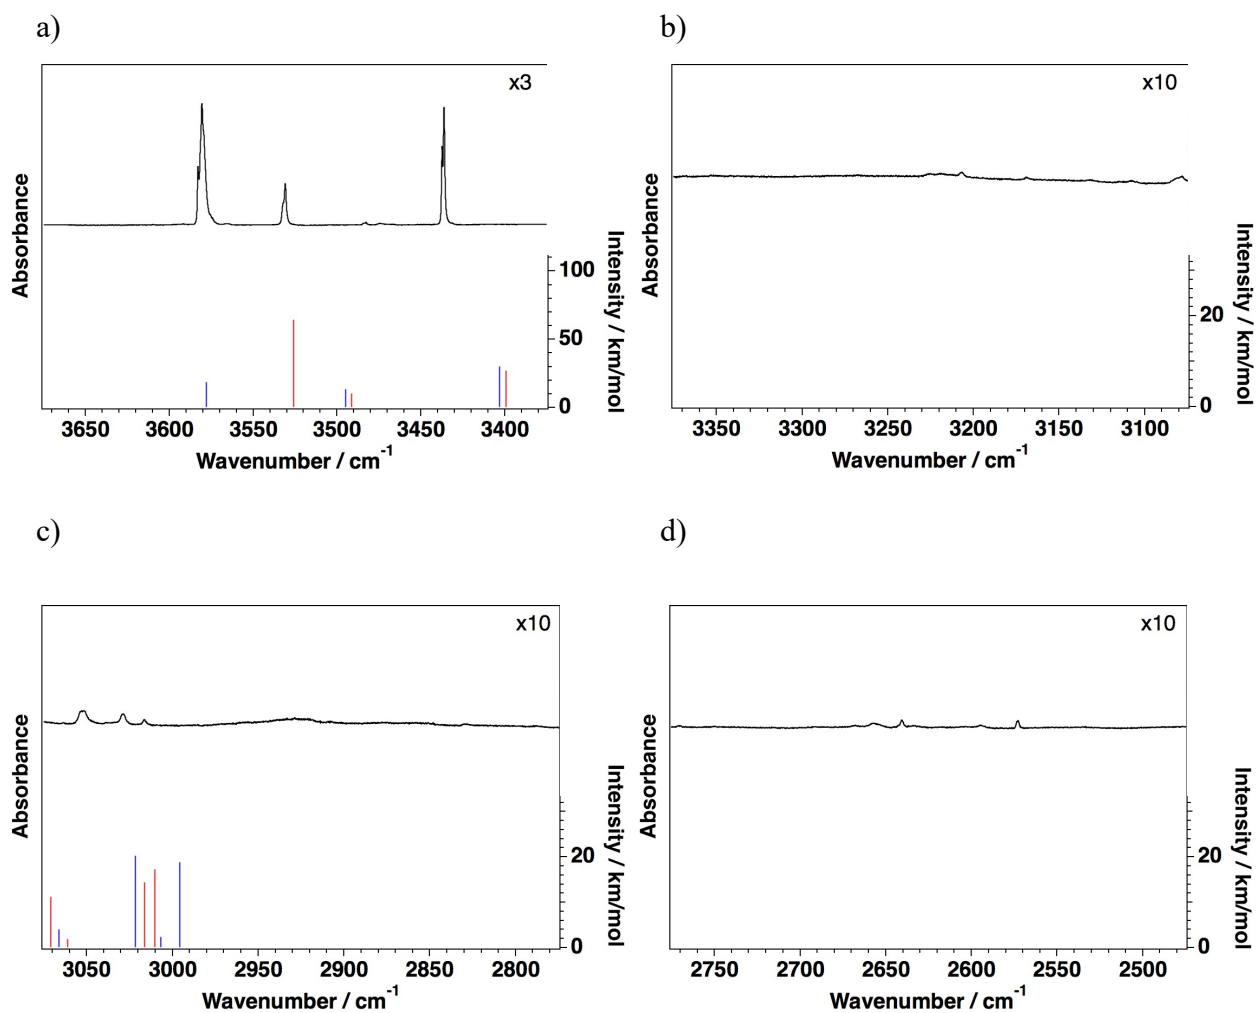

e)

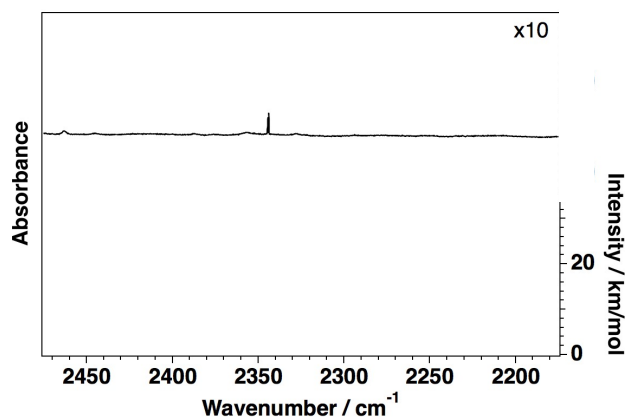

f)

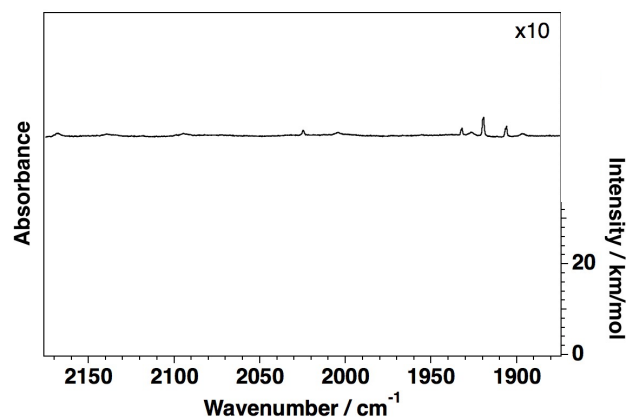

g)

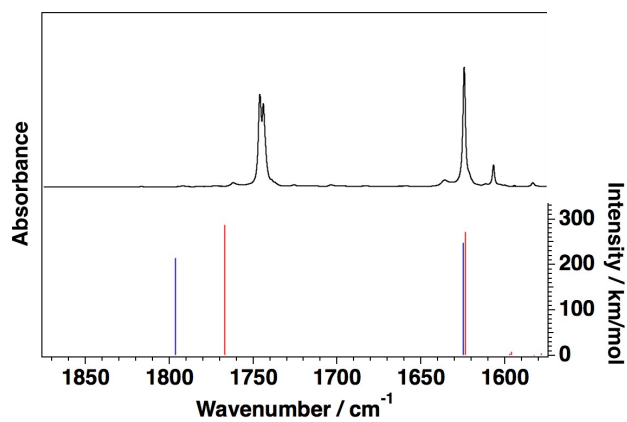

h)

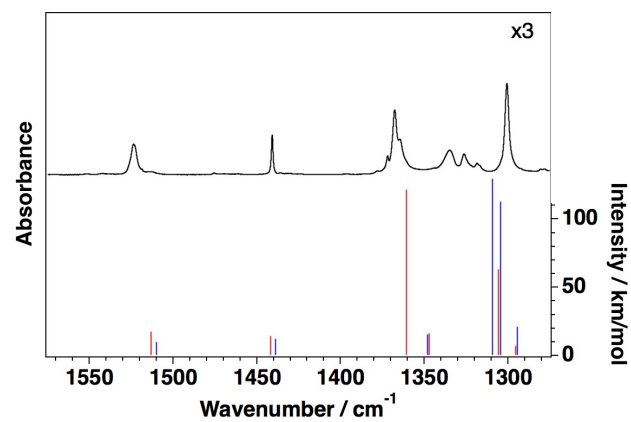

i)

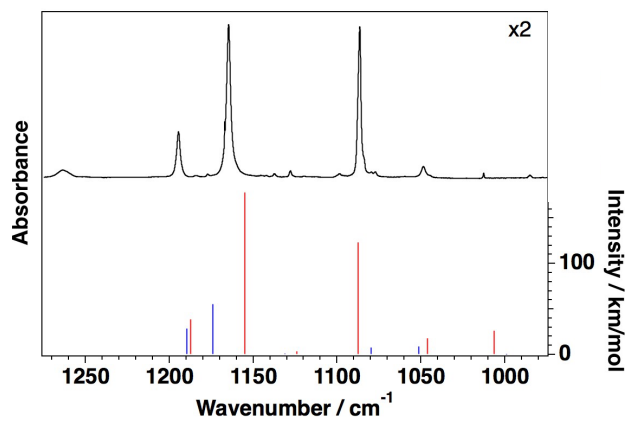

j)

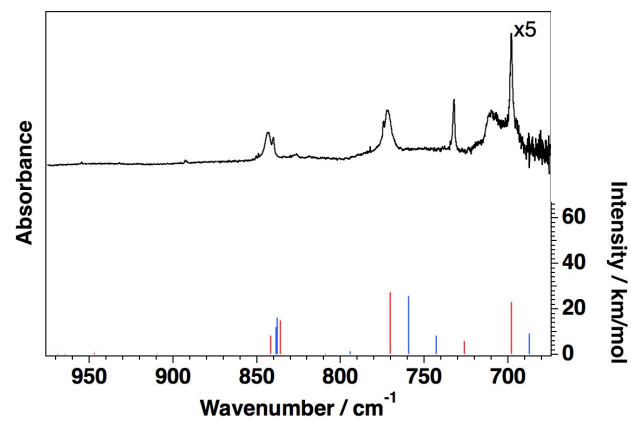

Table S3: The frequencies and intensities of the calculated PABA Conformer (**I**) compared to the calculated Conformer (**II**) and the experimental *p*H<sub>2</sub> matrix. Intensities are in parentheses beside frequencies.

| Mode       | Sym | Assignment           | Conformer (I)<br>(cm <sup>-1</sup> ) | Conformer (II)<br>(cm <sup>-1</sup> ) | <i>p</i> H <sub>2</sub> Matrix (cm <sup>-1</sup> ) |
|------------|-----|----------------------|--------------------------------------|---------------------------------------|----------------------------------------------------|
| $\nu_1$    | A   | O-C-O Wag            | 77.40 (0.69)                         | 50.01 (7.12)                          | n. o.                                              |
| $\nu_2$    |     | C-C Bend             | 101.16 (2.23)                        | 105.56 (1.54)                         | n. o.                                              |
| $\nu_3$    |     | C-C-C Scissor        | 189.34 (1.72)                        | 195.31 (6.33)                         | n. o.                                              |
| $\nu_4$    |     | C=C Wag              | 275.32 (1.46)                        | 277.03 (12.21)                        | n. o.                                              |
| $\nu_5$    |     | C=C-C Scissor        | 348.94 (30.76)                       | 351.56 (13.00)                        | n. o.                                              |
| $\nu_6$    |     | NH <sub>2</sub> Rock | 366.85 (2.15)                        | 345.16 (1.66)                         | n. o.                                              |
| $\nu_7$    |     | C-N Rock             | 383.66 (1.89)                        | 380.70 (7.94)                         | n. o.                                              |
| $\nu_8$    |     | NH <sub>2</sub> Wag  | 388.06 (1086.14)                     | 391.74 (39.58)                        | n. o.                                              |
| $\nu_9$    |     | C=C Twist            | 415.24 (1.08)                        | 404.83 (27.69)                        | n. o.                                              |
| $\nu_{10}$ |     | NH <sub>2</sub> Wag  | 439.60 (663.93)                      | 445.02 (1298.84)                      | n. o.                                              |
| $\nu_{11}$ |     | O-C-C Scissor        | 500.11 (14.08)                       | 404.02 (2641.23)                      | n. o.                                              |
| $\nu_{12}$ |     | O-H Bend             | 563.52 (56.18)                       | 475.95 (730.65)                       | n. o.                                              |
| $\nu_{13}$ |     | O-C-O Scissor        | 589.67 (158.76)                      | 599.92 (36.20)                        | n. o.                                              |
| $\nu_{14}$ |     | C=C-C Scissor        | 641.76 (1.41)                        | 642.30 (1.24)                         | n. o.                                              |
| $\nu_{15}$ |     | C=C-C Wag            | 697.92 (23.09)                       | 687.23 (9.28)                         | 698.0 (20.62)                                      |
| $\nu_{16}$ |     | O-C-O Scissor        | 725.94 (7.59)                        | 742.73 (8.27)                         | 732.3 (4.13)                                       |
| $\nu_{17}$ |     | C-C-C Bend           | 770.40 (27.35)                       | 759.42 (25.75)                        | 771.6 (10.92)                                      |
| $\nu_{18}$ |     | C-C-C Bend           | 809.04 (0.29)                        | 794.16 (1.32)                         | n. o.                                              |
| $\nu_{19}$ |     | C-C-C Bend           | 836.13 (14.97)                       | 838.04 (16.22)                        | 840*                                               |
| $\nu_{20}$ |     | C=C-C Scissor        | 841.92 (8.41)                        | 838.50 (12.08)                        | 843*                                               |
| $\nu_{21}$ |     | C-H Bend             | 947.20 (0.74)                        | 909.67 (0.47)                         | 954.6 (0.18)                                       |
| $\nu_{22}$ |     | H-C-C Scissor        | 964.63 (0.21)                        | 968.89 (0.28)                         | 967.4 (0.12)                                       |
| $\nu_{23}$ |     | H-C-C Rock           | 1006.49 (26.28)                      | 999.06 (0.84)                         | 1012.6 (0.68)                                      |
| $\nu_{24}$ |     | NH <sub>2</sub> Rock | 1046.07 (17.85)                      | 1051.34 (9.14)                        | 1048.5 (6.52)                                      |
| $\nu_{25}$ |     | NH <sub>2</sub> Rock | 1087.64 (123.18)                     | 1079.82 (7.83)                        | 1086.6 (54.61)                                     |
| $\nu_{26}$ |     | C-O Stretch          | 1124.00 (3.82)                       | 1131.30 (1.14)                        | 1127.9 (1.74)                                      |
| $\nu_{27}$ |     | H-C-C Bend           | 1154.98 (178.25)                     | 1173.98 (55.47)                       | 1164.8 (81.01)                                     |
| $\nu_{28}$ |     | C-O-H Scissor        | 1187.34 (38.55)                      | 1189.72 (28.34)                       | 1194.7 (19.26)                                     |
| $\nu_{29}$ |     | C-H Bend             | 1295.27 (7.09)                       | 1294.46 (21.24)                       | 1274.6 (1.23)                                      |
| $\nu_{30}$ |     | C-O Stretch          | 1305.85 (63.39)                      | 1304.45 (112.93)                      | 1300.6 (32.48)                                     |
| $\nu_{31}$ |     | C-O Stretch          | 1347.04 (16.10)                      | 1309.13 (129.43)                      | 1335*                                              |
| $\nu_{32}$ |     | H-C-O Bend           | 1360.55 (121.57)                     | 1348.09 (15.36)                       | 1364.2, 1367.8 (41.33)                             |
| $\nu_{33}$ |     | C=C Stretch          | 1441.77 (14.14)                      | 1438.93 (12.28)                       | 1440.9 (6.18)                                      |
| $\nu_{34}$ |     | C=C Asym. Str.       | 1513.15 (17.55)                      | 1510.00 (10.02)                       | 1523.8 (13.82)                                     |
| $\nu_{35}$ |     | C=C Asym. Str.       | 1578.09 (5.01)                       | 1582.56 (1.29)                        | 1583.3 (2.96)                                      |

|            |  |                         |                  |                  |                         |
|------------|--|-------------------------|------------------|------------------|-------------------------|
| $\nu_{36}$ |  | NH <sub>2</sub> Scissor | 1596.06 (8.61)   | 1596.88 (4.23)   | 1606.7 (12.26)          |
| $\nu_{37}$ |  | NH <sub>2</sub> Scissor | 1623.35 (271.97) | 1624.82 (247.70) | 1624.2 (100.00)         |
| $\nu_{38}$ |  | C=O Stretch             | 1767.10 (287.04) | 1796.53 (214.92) | 1743.9, 1746.3 (109.75) |
| $\nu_{39}$ |  | C-H Asym. Str.          | 3010.33 (17.31)  | 2995.80 (18.87)  | 3016.2 (0.70)           |
| $\nu_{40}$ |  | C-H Asym. Str.          | 3016.28 (14.37)  | 3006.91 (2.38)   | 3028.9 (2.57)           |
| $\nu_{41}$ |  | C-H Sym. Str.           | 3061.17 (1.94)   | 3021.66 (20.25)  | 3052.3 (3.25)           |
| $\nu_{42}$ |  | C-H Sym. Str.           | 3070.83 (11.15)  | 3066.25 (4.01)   | 3079.3 (3.01)           |
| $\nu_{43}$ |  | N-H Asym. Str.          | 3399.32 (26.90)  | 3403.04 (30.16)  | 3436.2, 3437.3 (19.59)  |
| $\nu_{44}$ |  | N-H Sym. Str.           | 3491.38 (10.41)  | 3494.92 (13.52)  | 3531.0, 3532.3 (8.59)   |
| $\nu_{45}$ |  | O-H Stretch             | 3525.95 (64.46)  | 3577.95 (18.67)  | 3580.4, 3583.0 (19.32)  |

Theoretical calculated with B3LYP / cc-pVDZ Anharmonic

Intensities in km/mol

Experimental intensities are relative to 1624.2 cm<sup>-1</sup> peak

\*Two PABA peaks overlap

Two values are given for doublet peaks; their combined intensity is written beside in parentheses.

n. o. = not observed



Table S4: The frequencies and intensities of the aromatic-centred anilino radical.

| <b>Frequency (cm<sup>-1</sup>)</b> | <b>Intensity (km/mol)</b> |
|------------------------------------|---------------------------|
| 654.25                             | 26.03                     |
| 766.81                             | 0.14                      |
| 781.50                             | 48.97                     |
| 799.32                             | 21.15                     |
| 888.18                             | 0.16                      |
| 909.37                             | 0.014                     |
| 970.12                             | 2.70                      |
| 1029.70                            | 4.083                     |
| 1070.07                            | 4.65                      |
| 1112.82                            | 5.73                      |
| 1152.66                            | 5.57                      |
| 1268.79                            | 0.07                      |
| 1276.33                            | 21.52                     |
| 1320.04                            | 4.55                      |
| 1398.45                            | 2.35                      |
| 1450.24                            | 22.54                     |
| 1568.73                            | 24.14                     |
| 1592.14                            | 0.51                      |
| 1606.46                            | 66.34                     |
| 3014.25                            | 7.51                      |
| 3017.48                            | 16.87                     |
| 3035.87                            | 4.00                      |
| 3043.28                            | 25.95                     |
| 3367.01                            | 5.51                      |
| 3448.78                            | 6.10                      |

Calculated with B3LYP / cc-pVDZ Anharmonic

Table S5: The frequencies and intensities of the aromatic-centred benzoic acid radical.

| <b>Frequency (cm<sup>-1</sup>)</b> | <b>Intensity (km/mol)</b> |
|------------------------------------|---------------------------|
| 729.32                             | 50.76                     |
| 763.07                             | 6.82                      |
| 795.10                             | 0.20                      |
| 822.77                             | 7.76                      |
| 920.97                             | 0.05                      |
| 967.78                             | 175.71                    |
| 972.57                             | 47.14                     |
| 1029.06                            | 9.86                      |
| 1074.37                            | 23.88                     |
| 1090.68                            | 1.79                      |
| 1156.65                            | 5.53                      |
| 1182.37                            | 16.73                     |
| 1270.52                            | 0.40                      |
| 1298.86                            | 343.65                    |
| 1324.29                            | 4.65                      |
| 1370.52                            | 39.41                     |
| 1442.56                            | 4.02                      |
| 1558.92                            | 12.17                     |
| 1588.92                            | 0.82                      |
| 1801.96                            | 15.81                     |
| 3013.32                            | 10.77                     |
| 3049.73                            | 2.91                      |
| 3056.14                            | 3.16                      |
| 3065.65                            | 2.76                      |
| 3581.69                            | 25.29                     |

Calculated with B3LYP / cc-pVDZ Anharmonic

Figure S2 a) through j) : The PABA radical peaks from > 280 nm, 266 nm, and 213 nm irradiation compared to the calculated anharmonic B3LYP / cc-pVDZ intensities.

Conformer (I) = Black      Conformer (II) = Pink

266 nm data is scaled by a factor of 2.

(I) = Conformer (I)

(II) = Conformer (II)

H = *trans*-HOCO Radical

\* = Unidentified Peak

C = CO<sub>2</sub>      O = CO

K = Unknown Ketene

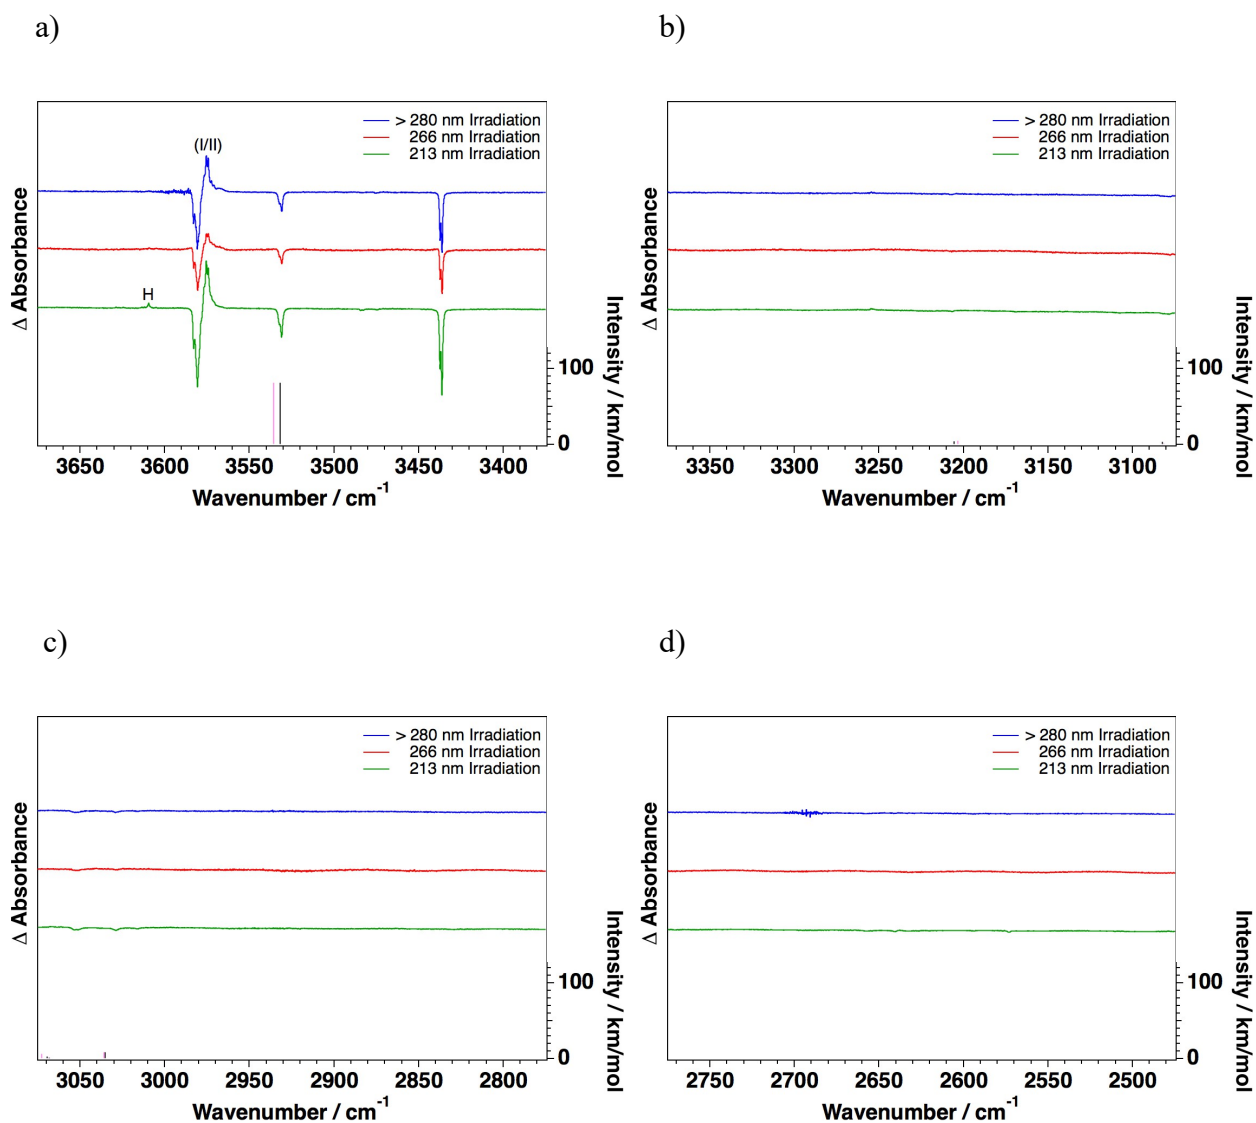

e)

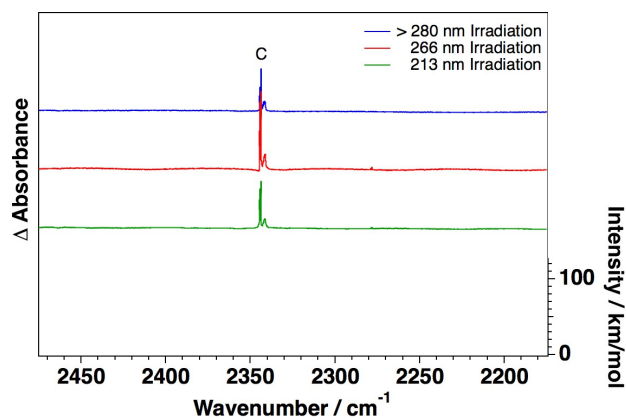

f)

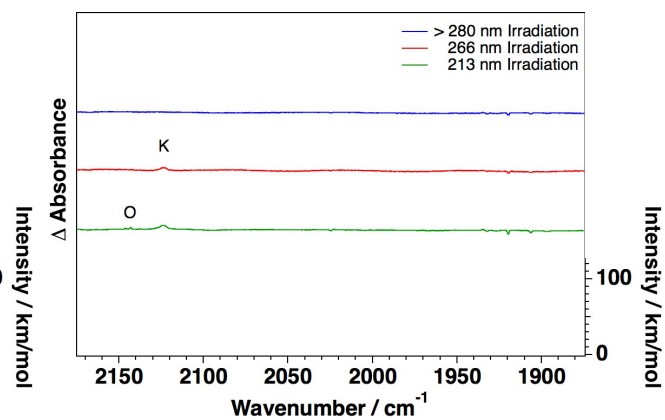

g)

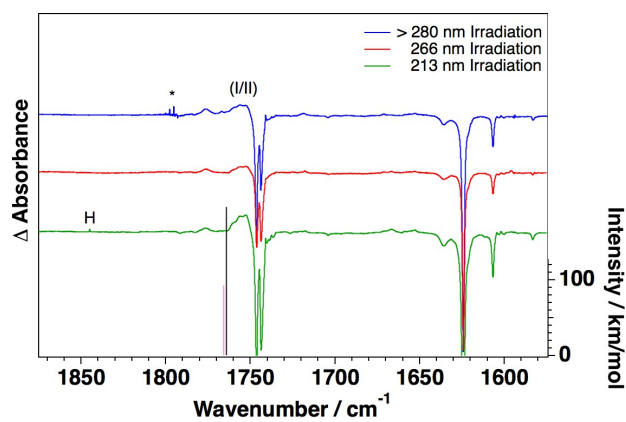

h)

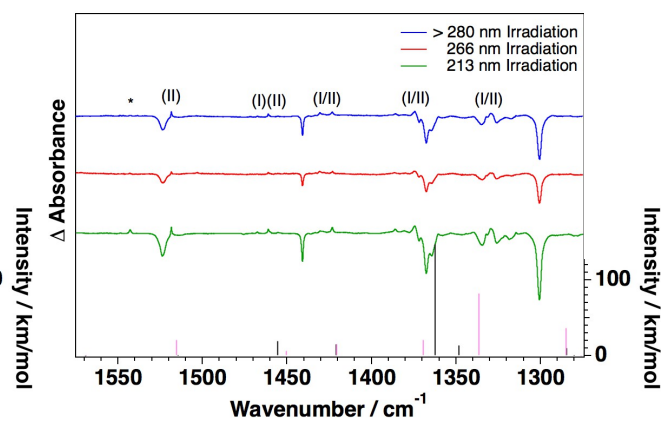

i)

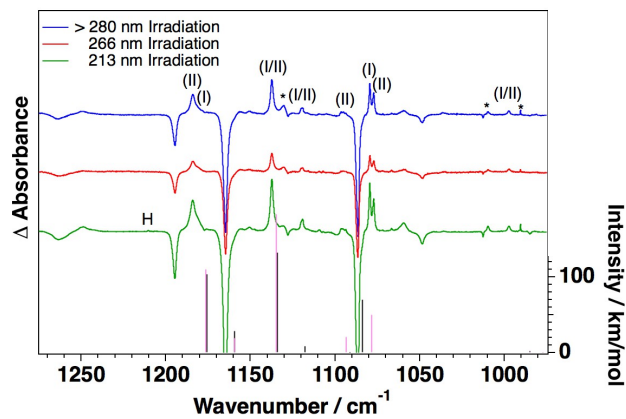

j)

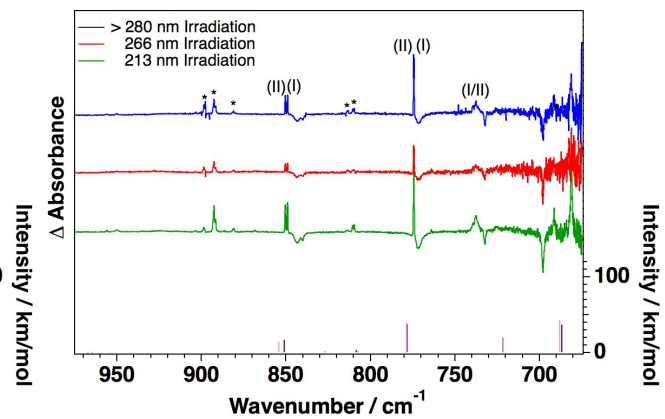

Figure S3 a) and b): The temporal behaviour of the unknown ketene following 266 nm and 213 nm photolysis. Concentrations estimated with intensities from methyl ketene.

a)

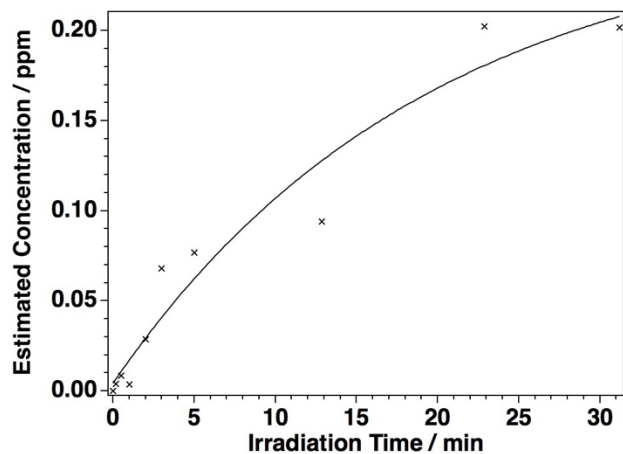

b)

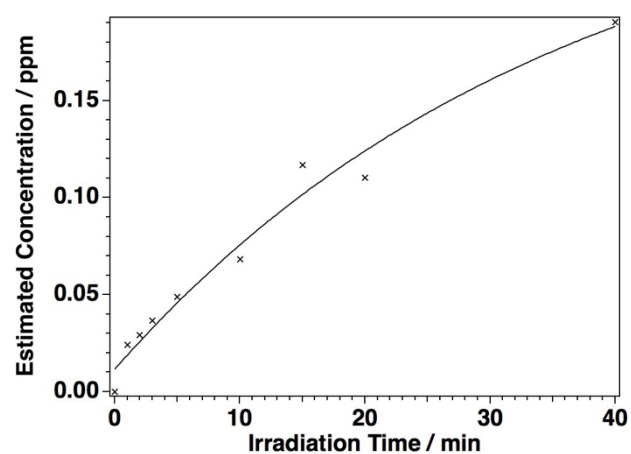

Table S6: The frequencies and intensities of the PABA radical Conformer (II) compared to the calculated Conformer (I) and the experimental  $pH_2$  matrix. Intensities are in parentheses beside frequencies.

| Mode       | Sym | Assignment      | Conformer (I)<br>( $cm^{-1}$ ) | Conformer (II)<br>( $cm^{-1}$ ) | $pH_2$ Matrix<br>( $cm^{-1}$ )<br>Conformer (I) | $pH_2$ Matrix<br>( $cm^{-1}$ )<br>Conformer (I) |
|------------|-----|-----------------|--------------------------------|---------------------------------|-------------------------------------------------|-------------------------------------------------|
| $\nu_1$    | A'  | O-C-O Wag       | 75.47 (2.21)                   | 76.21 (0.23)                    | n. o.                                           | n. o.                                           |
| $\nu_2$    |     | C-C Bend        | 98.94 (0.26)                   | 98.49 (0.28)                    | n. o.                                           | n. o.                                           |
| $\nu_3$    |     | C=C Wag         | 259.69 (2.27)                  | 260.28 (1.96)                   | n. o.                                           | n. o.                                           |
| $\nu_4$    |     | C=C Wag         | 385.85 (5.85)                  | 386.13 (2.74)                   | n. o.                                           | n. o.                                           |
| $\nu_5$    |     | C=C-C Wag       | 476.26 (15.10)                 | 473.99 (24.95)                  | n. o.                                           | n. o.                                           |
| $\nu_6$    |     | O-H OOP<br>Bend | 567.44 (45.00)                 | 570.77 (47.71)                  | n. o.                                           | n. o.                                           |
| $\nu_7$    |     | H-N-C Bend      | 663.64 (50.01)                 | 660.53 (48.21)                  | n. o.                                           | n. o.                                           |
| $\nu_8$    |     | C-H Bend        | 686.98 (37.37)                 | 688.05 (42.63)                  | n. o.                                           | n. o.                                           |
| $\nu_9$    |     | C-C-C Bend      | 778.48 (38.00)                 | 778.74 (39.86)                  | 774.3 (16.5)                                    | 774.6 (19.0)                                    |
| $\nu_{10}$ |     | C-H OOP<br>Bend | 808.67 (3.56)                  | 807.51 (2.60)                   | n. o.                                           | n. o.                                           |
| $\nu_{11}$ |     | C-C-C Bend      | 851.22 (16.97)                 | 854.31 (14.04)                  | 849.1 (13.0)                                    | 850.5 (11.7)                                    |
| $\nu_{12}$ |     | H-C-C Wag       | 967.18 (0.18)                  | 977.21 (0.42)                   | n. o.                                           | n. o.                                           |
| $\nu_{13}$ |     | H-C-C Rock      | 964.65 (0.33)                  | 953.12 (0.04)                   | n. o.                                           | n. o.                                           |
| $2\nu_6$   |     | O-H Bend        | 1117.83 (8.28)                 | 1124.85 (6.87)                  | 1119.5 (22.5)                                   | 1119.5 (22.5)                                   |
| $\nu_{14}$ | A'' | C-C-C Scissor   | 197.25 (2.81)                  | 197.19 (0.44)                   | n. o.                                           | n. o.                                           |
| $\nu_{15}$ |     | C=C-C Scissor   | 348.48 (3.05)                  | 348.30 (2.32)                   | n. o.                                           | n. o.                                           |
| $\nu_{16}$ |     | N-C-C Scissor   | 402.69 (6.98)                  | 402.32 (9.71)                   | n. o.                                           | n. o.                                           |
| $\nu_{17}$ |     | O-C-C Scissor   | 502.77 (3.58)                  | 501.98 (8.03)                   | n. o.                                           | n. o.                                           |
| $\nu_{18}$ |     | O-C-O Scissor   | 591.16 (41.27)                 | 591.67 (37.82)                  | n. o.                                           | n. o.                                           |
| $\nu_{19}$ |     | C=C-C Scissor   | 626.22 (0.17)                  | 625.73 (1.04)                   | n. o.                                           | n. o.                                           |
| $\nu_{20}$ |     | O-C-O Scissor   | 721.73 (19.67)                 | 721.77 (18.91)                  | 737.6 (36.4)                                    | 737.6 (36.4)                                    |
| $\nu_{21}$ |     | C=C-C Scissor   | 826.94 (1.29)                  | 826.89 (1.36)                   | n. o.                                           | n. o.                                           |
| $\nu_{22}$ |     | H-C-C Wag       | 984.84 (1.99)                  | 984.84 (1.43)                   | 997.3 (8.3)                                     | 997.3 (8.3)                                     |
| $\nu_{23}$ |     | H-C-C Rock      | 1083.84 (70.35)                | 1078.48 (49.80)                 | 1079.5 (49.0)                                   | 1077.2 (35.3)                                   |
| $\nu_{24}$ |     | O-C-C Stretch   | 1091.25 (0.75)                 | 1093.57 (20.98)                 | n. o.                                           | 1095.3 (25.6)                                   |
| $\nu_{25}$ |     | H-C-C Bend      | 1134.02 (132.18)               | 1134.69 (183.40)                | 1137.4 (92.3)                                   | 1137.4 (92.3)                                   |
| $\nu_{26}$ |     | H-N-C Bend      | 1159.28 (28.95)                | 1159.38 (19.03)                 | n. o.                                           | n. o.                                           |
| $\nu_{27}$ |     | H-O-C Scissor   | 1175.83 (103.46)               | 1176.46 (109.87)                | 1180.8 (24.0)                                   | 1184.2<br>(100.00)                              |
| $\nu_{28}$ |     | C-H Rock        | 1284.48 (9.83)                 | 1284.88 (36.69)                 | n. o.                                           | n. o.                                           |
| $\nu_{29}$ |     | C-N Stretch     | 1280.07 (0.57)                 | 1276.05 (0.19)                  | n. o.                                           | n. o.                                           |
| $\nu_{30}$ |     | H-N-C Stretch   | 1348.41 (13.87)                | 1336.48 (82.29)                 | 1329.3*                                         | 1329.3*                                         |

|            |  |                     |                  |                 |                                                                    |                                                                    |
|------------|--|---------------------|------------------|-----------------|--------------------------------------------------------------------|--------------------------------------------------------------------|
|            |  |                     |                  |                 | 1332.0*                                                            | 1332.0*                                                            |
| $\nu_{31}$ |  | C-C-O Bend          | 1362.56 (147.40) | 1369.37 (20.75) | 1374.6 (13.5)                                                      | 1374.6 (13.5)                                                      |
| $\nu_{32}$ |  | C=C Asym.<br>Str.   | 1420.91 (15.27)  | 1420.76 (14.69) | 1423.3 (5.8)<br>1429.5 (5.9)                                       | 1423.3 (5.8)<br>1429.5 (5.9)                                       |
| $\nu_{33}$ |  | C=C Sym. Str.       | 1455.42 (19.56)  | 1450.59 (6.26)  | 1461.1 (3.3)                                                       | 1460.0 (1.1)                                                       |
| $\nu_{34}$ |  | C=C-C Asym.<br>Str. | 1514.64 (0.74)   | 1515.47 (20.46) | n. o.                                                              | 1518.5 (4.5)                                                       |
| $\nu_{35}$ |  | C=C-C Asym.<br>Str. | 1569.31 (0.10)   | 1569.07 (0.67)  | n. o.                                                              | n. o.                                                              |
| $\nu_{36}$ |  | C=O Stretch         | 1764.16 (196.99) | 1765.90 (92.99) | 1744 – 1746*                                                       | 1744 – 1746*                                                       |
| $\nu_{37}$ |  | C-H Asym.<br>Str.   | 3035.31 (8.71)   | 3036.04 (8.42)  | n. o.                                                              | n. o.                                                              |
| $\nu_{38}$ |  | C-H Sym. Str.       | 3069.40 (2.87)   | 3072.62 (6.48)  | n. o.                                                              | n. o.                                                              |
| $\nu_{39}$ |  | C-H Asym.<br>Str.   | 3068.19 (1.31)   | 3068.53 (1.28)  | n. o.                                                              | n. o.                                                              |
| $\nu_{40}$ |  | C-H Sym. Str.       | 3082.43 (3.25)   | 3081.33 (1.33)  | n. o.                                                              | n. o.                                                              |
| $\nu_{41}$ |  | N-H Stretch         | 3205.58 (4.48)   | 3203.48 (5.36)  | n. o.                                                              | n. o.                                                              |
| $\nu_{42}$ |  | O-H Stretch         | 3531.75 (81.52)  | 3535.61 (81.74) | 3570.9 (2.3);<br>3572.7 (15.5);<br>3574.3 (29.0);<br>3575.5 (41.3) | 3570.9 (2.3);<br>3572.7 (15.5);<br>3574.3 (29.0);<br>3575.5 (41.3) |

Theoretical calculated with B3LYP / cc-pVDZ Anharmonic

Intensities in km/mol

Experimental intensities are relative to 1184.2 cm<sup>-1</sup> peak

\*PABA radical peak overlaps with a PABA peak

Two values are given for doublet peaks

n. o. = not observed

Table S7: Other photoproducts observed following PABA irradiation.

| Photoproduct               | Previously Recorded (cm <sup>-1</sup> ) | pH <sub>2</sub> Matrix (cm <sup>-1</sup> ) |
|----------------------------|-----------------------------------------|--------------------------------------------|
| <i>trans</i> -HOCO $\nu_3$ | 1210.3                                  | 1210.3                                     |
| <i>trans</i> -HOCO $\nu_2$ | 1845.1                                  | 1845.1                                     |
| Unknown Ketene             | ---                                     | 2124.6                                     |
| CO                         | 2142.1                                  | 2142.1                                     |
| CO <sub>2</sub>            | 2343.1                                  | 2343.1                                     |
| <i>trans</i> -HOCO $\nu_1$ | 3612.2                                  | 3612.2                                     |

Table S8: The frequencies and intensities of the PABA radical Conformer (III) and Conformer (IV).

| Mode       | Sym | Assignment      | Conformer (III)<br>Frequency<br>(cm <sup>-1</sup> ) | Conformer (III)<br>Intensity<br>(km mol <sup>-1</sup> ) | Conformer<br>(IV)<br>Frequency<br>(cm <sup>-1</sup> ) | Conformer<br>(IV) Intensity<br>(km mol <sup>-1</sup> ) |
|------------|-----|-----------------|-----------------------------------------------------|---------------------------------------------------------|-------------------------------------------------------|--------------------------------------------------------|
| $\nu_1$    | A   | O-C-O Wag       | 50.35                                               | 8.54                                                    | 52.03                                                 | 4.73                                                   |
| $\nu_2$    |     | C-C Bend        | 100.20                                              | 4.20                                                    | 98.80                                                 | 4.74                                                   |
| $\nu_3$    |     | C=C Wag         | 258.80                                              | 1.77                                                    | 258.26                                                | 2.73                                                   |
| $\nu_4$    |     | C=C Wag         | 379.28                                              | 1.49                                                    | 381.25                                                | 15.90                                                  |
| $\nu_5$    |     | C=C-C Wag       | 405.00                                              | 79.67                                                   | 391.25                                                | 114.27                                                 |
| $\nu_6$    |     | O-H OOP<br>Bend | 509.65                                              | 8.51                                                    | 510.81                                                | 2.76                                                   |
| $\nu_7$    |     | H-N-C Bend      | 668.55                                              | 704.74                                                  | 666.55                                                | 117.31                                                 |
| $\nu_8$    |     | C-H Bend        | 674.44                                              | 4007.59                                                 | 675.15                                                | 2636.93                                                |
| $\nu_9$    |     | C-C-C Bend      | 768.73                                              | 12.77                                                   | 768.66                                                | 14.93                                                  |
| $\nu_{10}$ |     | C-H OOP<br>Bend | 800.30                                              | 1.04                                                    | 796.04                                                | 8.28                                                   |
| $\nu_{11}$ |     | C-C-C Bend      | 843.44                                              | 26.68                                                   | 855.48                                                | 15.55                                                  |
| $\nu_{12}$ |     | H-C-C Wag       | 973.58                                              | 0.37                                                    | 980.51                                                | 1.67                                                   |
| $\nu_{13}$ |     | H-C-C Rock      | 940.55                                              | 0.34                                                    | 925.39                                                | 0.20                                                   |
| $2\nu_6$   |     | O-H Bend        | 1017.75                                             | 0.11                                                    | 1020.12                                               | 0.13                                                   |
| $\nu_{14}$ |     | C-C-C Scissor   | 205.20                                              | 14.65                                                   | 202.67                                                | 9.33                                                   |
| $\nu_{15}$ |     | C=C-C Scissor   | 344.15                                              | 0.92                                                    | 342.54                                                | 2.53                                                   |
| $\nu_{16}$ |     | N-C-C Scissor   | 403.47                                              | 2.43                                                    | 404.16                                                | 13.94                                                  |
| $\nu_{17}$ |     | O-C-C Scissor   | 471.98                                              | 8.82                                                    | 463.85                                                | 5.49                                                   |
| $\nu_{18}$ |     | O-C-O Scissor   | 599.12                                              | 7.65                                                    | 598.81                                                | 6.27                                                   |
| $\nu_{19}$ |     | C=C-C Scissor   | 626.86                                              | 0.03                                                    | 626.38                                                | 1.22                                                   |
| $\nu_{20}$ |     | O-C-O Scissor   | 743.55                                              | 4.65                                                    | 742.49                                                | 8.52                                                   |
| $\nu_{21}$ |     | C=C-C Scissor   | 829.34                                              | 1.22                                                    | 829.36                                                | 1.67                                                   |
| $\nu_{22}$ |     | H-C-C Wag       | 980.24                                              | 2.25                                                    | 982.84                                                | 0.52                                                   |
| $\nu_{23}$ |     | H-C-C Rock      | 1074.20                                             | 13.00                                                   | 1072.39                                               | 20.04                                                  |
| $\nu_{24}$ |     | O-C-C Stretch   | 1093.04                                             | 12.75                                                   | 1095.89                                               | 11.30                                                  |
| $\nu_{25}$ |     | H-C-C Bend      | 1141.25                                             | 20.32                                                   | 1140.62                                               | 32.83                                                  |
| $\nu_{26}$ |     | H-N-C Bend      | 1157.40                                             | 8.66                                                    | 1161.26                                               | 22.20                                                  |
| $\nu_{27}$ |     | H-O-C Scissor   | 1187.86                                             | 10.31                                                   | 1168.25                                               | 19.65                                                  |
| $\nu_{28}$ |     | C-H Rock        | 1289.31                                             | 58.66                                                   | 1285.18                                               | 10.55                                                  |
| $\nu_{29}$ |     | C-N Stretch     | 1279.82                                             | 59.88                                                   | 1282.74                                               | 33.72                                                  |
| $\nu_{30}$ |     | H-N-C Stretch   | 1300.79                                             | 219.58                                                  | 1297.00                                               | 483.88                                                 |
| $\nu_{31}$ |     | C-C-O Bend      | 1361.58                                             | 19.62                                                   | 1352.31                                               | 2.05                                                   |



|            |  |                     |         |        |         |        |
|------------|--|---------------------|---------|--------|---------|--------|
| $\nu_{32}$ |  | C=C Asym.<br>Str.   | 1420.55 | 19.97  | 1423.90 | 12.21  |
| $\nu_{33}$ |  | C=C Sym. Str.       | 1449.77 | 11.39  | 1448.29 | 2.44   |
| $\nu_{34}$ |  | C=C-C Asym.<br>Str. | 1512.18 | 0.02   | 1512.75 | 3.00   |
| $\nu_{35}$ |  | C=C-C Asym.<br>Str. | 1563.76 | 0.05   | 1564.64 | 0.98   |
| $\nu_{36}$ |  | C=O Stretch         | 1786.44 | 196.76 | 1787.89 | 182.16 |
| $\nu_{37}$ |  | C-H Asym.<br>Str.   | 3003.48 | 7.95   | 3005.98 | 14.59  |
| $\nu_{38}$ |  | C-H Sym. Str.       | 3061.01 | 3.30   | 3062.16 | 1.31   |
| $\nu_{39}$ |  | C-H Asym.<br>Str.   | 3026.31 | 19.40  | 3030.24 | 8.02   |
| $\nu_{40}$ |  | C-H Sym. Str.       | 3064.70 | 2.32   | 3068.65 | 2.58   |
| $\nu_{41}$ |  | N-H Stretch         | 3229.16 | 3.08   | 3225.34 | 4.03   |
| $\nu_{42}$ |  | O-H Stretch         | 3577.19 | 26.02  | 3576.12 | 23.71  |

Theoretical calculated with B3LYP / cc-pVDZ Anharmonic
